# Supplementary material for: Polymer nanoparticles with electrostatically loaded multicargo for combined cancer phototherapy
Source: Royal Society of Chemistry journal article supplement (doi:10.1039/c5tb00234f), 2015-01-01
Supplement: c5tb00234f1.pdf [file c5tb00234f1.pdf]

Supplementary Information

## Polymer nanoparticles with electrostatically loaded multicargo for combined cancer phototherapy

Aurore Fraix,<sup>a‡</sup> Ilse Manet,<sup>b‡</sup> Marco Ballestri,<sup>b</sup> Andrea Guerrini,<sup>b</sup> Paolo Dambroso,<sup>b</sup> Giovanna Sotgiu,<sup>b</sup> Greta Varchi,<sup>b,\*</sup> Monica Camerin,<sup>c</sup> Olimpia Coppellotti,<sup>c</sup> and Salvatore Sortino<sup>a,\*</sup>

<sup>a</sup>Laboratory of Photochemistry, Department of Drug Sciences, University of Catania, I-95125 Catania, Italy. E-mail: ssortino@unict.it

<sup>b</sup>Istituto per la Sintesi Organica e la Fotoreattività-CNR, I-40129, Bologna Italy. E-mail: greta.varchi@isof.cnr.it

<sup>c</sup>Department of Biology, University of Padova, via U. Bassi 58/b, 35121 Padova-Italy

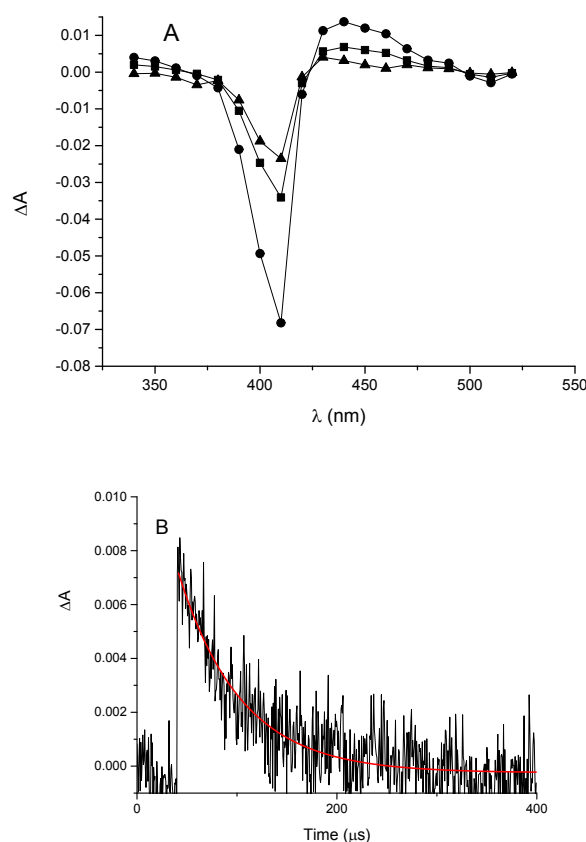

**Fig. S1** (A) Transient absorption spectra observed 0.1 μs (○), 20 μs (□), 80 μs (●) and 300 μs (⊙) after 532 nm laser excitation ( $E_{532} \sim 10$  mJ/ pulse) of Ar-saturated aqueous dispersions of NP 1 co-loaded with 2. (B) Decay trace monitored at 440 nm and the related first-order fitting.

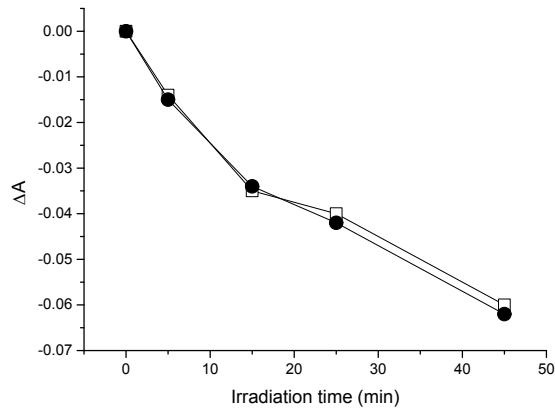

**Fig. S2** Absorbance changes observed at 380 nm upon 400 nm light irradiation of NP 1 loaded with **3** (●), and **2+3** (◻). The data are corrected for the different amount of photons absorbed by the NO photodonor in the two different samples.

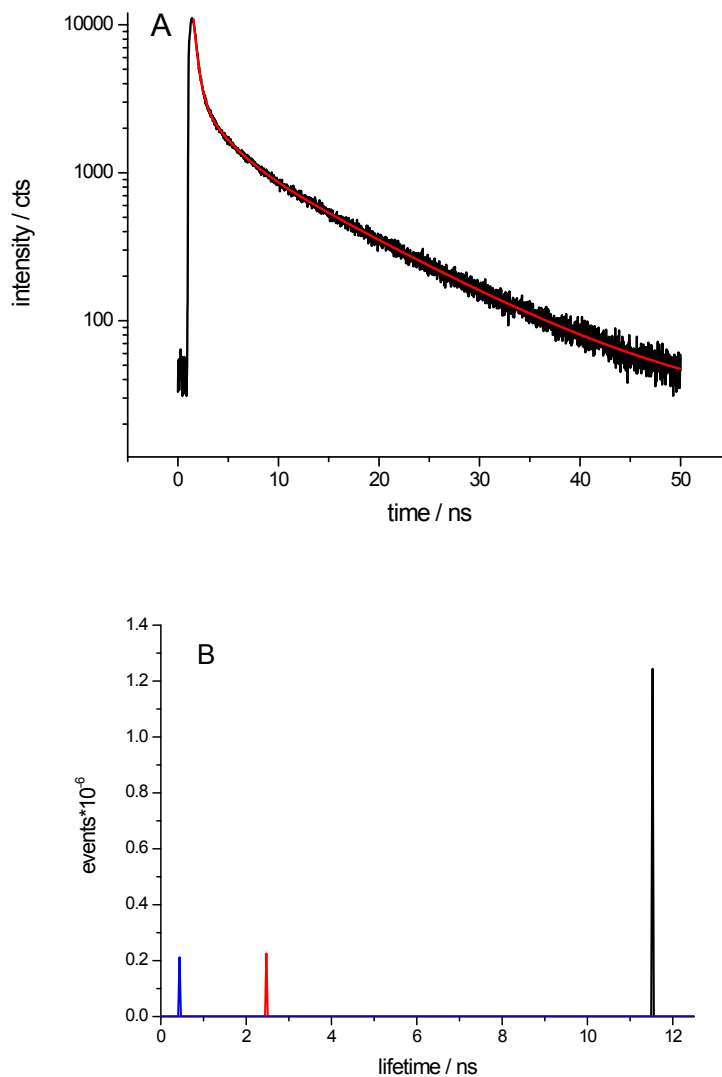

**Fig. S3** (A) Decay calculated for ROI comprising both nucleus and cytoplasm; tail-fit with a three-exponential function gave satisfactory results. (B) Histogram of the three lifetimes obtained after fitting of the selected ROI; pre-exponential factors were fitted while the lifetimes were fixed.

**Table S1.** Hydrodynamic diameter measurements by dynamic light scattering in mQ water of NPs and NPs loaded with **2 + 3** (five measurements).

| Sample   | Eff.Diam. (nm) | PDI  | Baseline Index | Sample                  | Eff. Diam. (nm) | PDI  | Baseline Index |
|----------|----------------|------|----------------|-------------------------|-----------------|------|----------------|
| NPs (1°) | 102,73         | 0,02 | 8,67           | NPs + <b>2 + 3</b> (1°) | 298,43          | 0,34 | 0,00           |
| NPs (2°) | 107,00         | 0,07 | 4,72           | NPs + <b>2 + 3</b> (1°) | 292,38          | 0,32 | 0,00           |
| NPs (3°) | 107,84         | 0,12 | 8,83           | NPs + <b>2 + 3</b> (1°) | 280,53          | 0,33 | 0,00           |
| NPs (4°) | 106,18         | 0,10 | 8,63           | NPs + <b>2 + 3</b> (1°) | 276,06          | 0,32 | 0,00           |
| NPs (5°) | 103,10         | 0,06 | 0,00           | NPs + <b>2 + 3</b> (1°) | 276,53          | 0,34 | 0,00           |
| Mean     | 105,37         | 0,08 | 6,17           | Mean                    | 284,79          | 0,33 | 0,00           |
| Std Err  | 1,04           | 0,02 | 1,73           | Std Err                 | 4,51            | 0,00 | 0,00           |
| Std Dev  | 2,32           | 0,04 | 3,86           | Std Dev                 | 10,08           | 0,01 | 0,00           |

**Table S2.**  $\zeta$ -potential measurements in mQ water of NPs and NPs loaded with **2 + 3** (five measurements).

| Sample  | Zeta Potential (mV) | Mobility ( $\mu$ s)/(V/cm) | RMS Residual | Sample             | Zeta Potential (mV) | Mobility ( $\mu$ s)/(V/cm) | RMS Residual |
|---------|---------------------|----------------------------|--------------|--------------------|---------------------|----------------------------|--------------|
| NPs     | 58,49               | 4,57                       | 2,16E-02     | NPs + <b>2 + 3</b> | 41,76               | 3,26                       | 1,63E-02     |
|         | 52,76               | 4,12                       | 2,31E-02     |                    | 44,95               | 3,51                       | 3,17E-02     |
|         | 50,23               | 3,92                       | 2,74E-02     |                    | 41,89               | 3,27                       | 1,45E-02     |
|         | 56,05               | 4,38                       | 3,39E-02     |                    | 40,60               | 3,17                       | 1,25E-02     |
|         | 53,02               | 4,14                       | 2,63E-02     |                    | 42,49               | 3,32                       | 1,62E-02     |
| Mean    | 54,11               | 4,23                       | 2,65E-02     | Mean               | 42,34               | 3,31                       | 1,82E-02     |
| Std Err | 1,43                | 0,11                       | 2,14E-03     | Std Err            | 0,72                | 0,06                       | 3,44E-03     |
| Std Dev | 3,20                | 0,25                       | 4,79E-03     | Std Dev            | 1,61                | 0,13                       | 7,69E-03     |

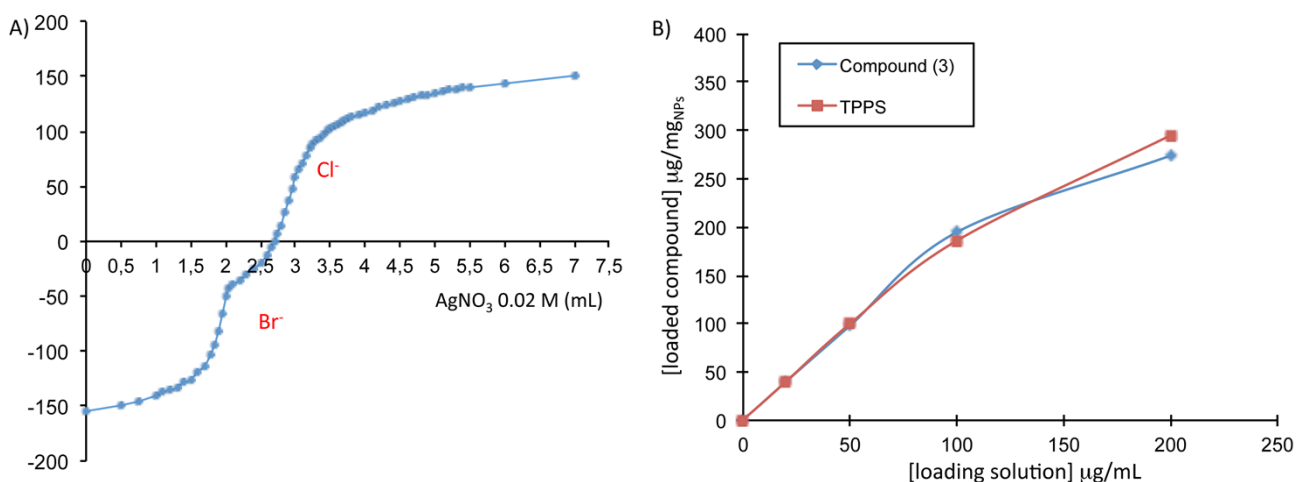

**Fig. S4** (A) NPs titration curve and (B) loading calibration curve with TPPS and compound **3**.

A)

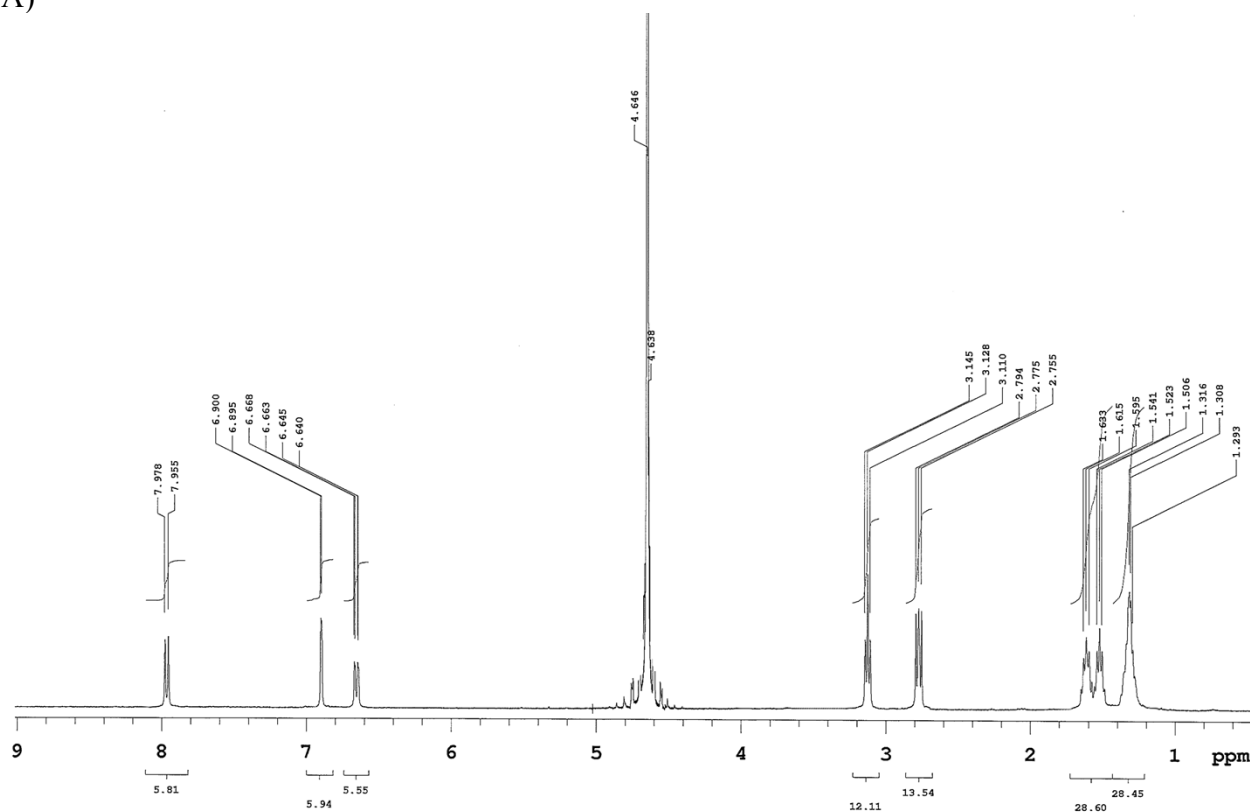

B)

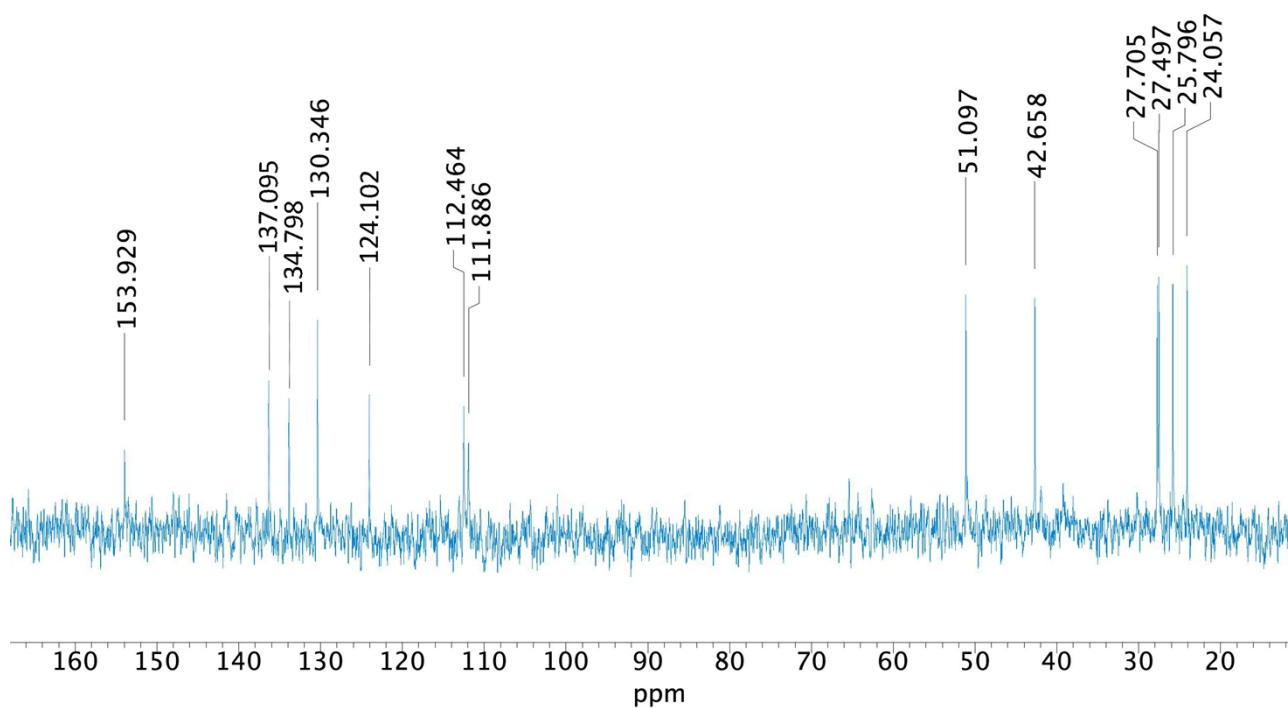

**Fig. S5** (A)  $^1\text{H}$ NMR of compound **3** in  $\text{D}_2\text{O}$ , rt, 400 MHz. (B)  $^{12}\text{C}$ NMR of compound **3** in  $\text{D}_2\text{O}$ , rt, 100 MHz.

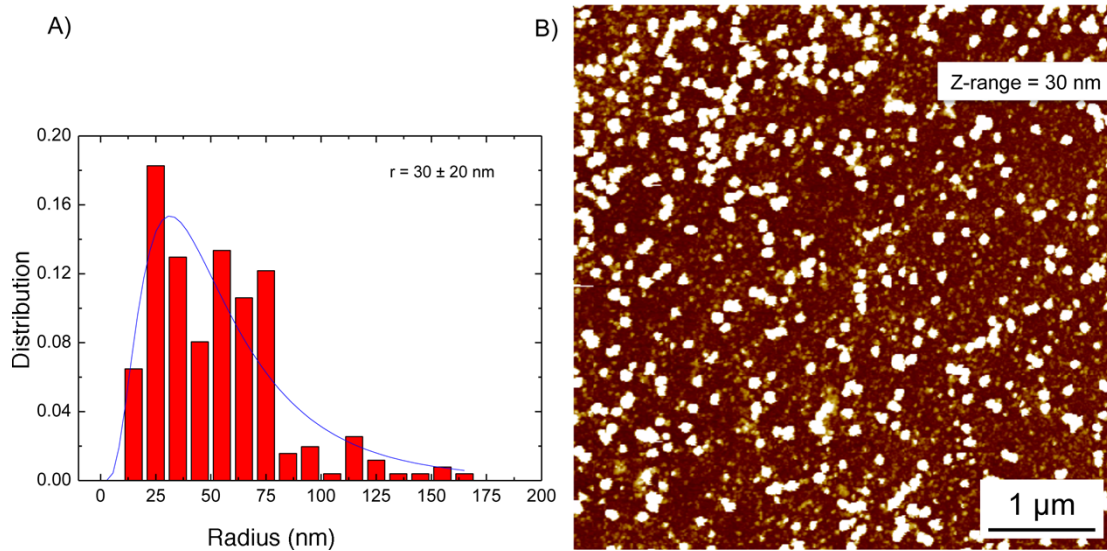

**Figure S6.** (A) Distribution (%) of nanoparticle radius. B) AFM image of nanospheres deposited on atomic flat silicon Z-range =  $14 \pm 5 \text{ nm}$
